# Supplementary material
Source: publisher figshare collection journal article supplement (https://acs.figshare.com/ndownloader/files/9737560)
Supplement: Supplementary file 1 [file 9737560]

Compound #	SMILES	PAINS Count	IC50 (mM)
12a	O/N=C\C1=NC=CN1CCCCCC(N(CC2=CC=C(OC)C=C2)CC(NC(C)C)=O)=O	0	>1
12b	O/N=C\C1=NC=CN1CCCCCC(N(CCCC)CC(NC(C)C)=O)=O	0	>1
12c	O/N=C\C1=[N+](C)C=CN1CCCCCC(N(CC2=CC=C(OC)C=C2)CC(NCC3=CC=CC=C3)=O)=O.[I-]	0	0.18
12d	O=C(CCCCCN1C=CN=C1/C=N\O)N(CCCC)CC(NCC2=CC=CC=C2)=O	0	>1
12e	O/N=C\C1=NC=CN1CCCCCC(N(CCOC)CC(NCC2=CC=CC=C2)=O)=O	0	>1
12f	O/N=C\C1=NC=CN1CCCCCC(N(CCOC)CC(NC(C)C)=O)=O	0	>1
13a	O/N=C\C1=NC=CN1CCCC(N(CC2=CC=C(OC)C=C2)CC(NC(C)C)=O)=O	0	>1
13b	O/N=C\C1=NC=CN1CCCC(N(CC2=CC=C(OC)C=C2)CC(NCC3=CC=CC=C3)=O)=O	0	>1
13c	O/N=C\C1=NC=CN1CCCC(N(CCCC)CC(NCC2=CC=CC=C2)=O)=O	0	>1
14a	O/N=C\C1=NC=CN1CC(N(CCCC)CC(NC(C)C)=O)=O	0	>0.25
14b	O/N=C\C1=NC=CN1CC(N(CC2=CC=C(OC)C=C2)CC(NC(C)C)=O)=O	0	>0.25
14c	O/N=C\C1=NC=CN1CC(N(CC2=CC=C(OC)C=C2)CC(NCC3=CC=CC=C3)=O)=O	0	>0.25
14d	O/N=C\C1=NC=CN1CC(N(CCCC)CC(NCC2=CC=CC=C2)=O)=O	0	>0.25
15a	O/N=C\C1=[N+](C)C=CN1CCCCCC(N(CC2=CC=C(OC)C=C2)CC(NC(C)C)=O)=O.[I-]	0	>1
15b	O/N=C\C1=[N+](C)C=CN1CCCCCC(N(CCCC)CC(NC(C)C)=O)=O.[I-]	0	>1
15c	O/N=C\C1=[N+](C)C=CN1CCCCCC(N(CC2=CC=C(OC)C=C2)CC(NCC3=CC=CC=C3)=O)=O.[I-]	0	>1
15d	O/N=C\C1=[N+](C)C=CN1CCCCCC(N(CCCC)CC(NCC2=CC=CC=C2)=O)=O.[I-]	0	0.05
16a	O/N=C\C1=[N+](C)C=CN1CCCC(N(CC2=CC=C(OC)C=C2)CC(NC(C)C)=O)=O.[I-]	0	0.25
16b	O/N=C\C1=[N+](C)C=CN1CCCC(N(CC2=CC=C(OC)C=C2)CC(NCC3=CC=CC=C3)=O)=O.[I-]	0	0.1
17a	O/N=C\C1=[N+](C)C=CN1CC(N(CCCC)CC(NC(C)C)=O)=O.[I-]	0	>0.25
17b	O/N=C\C1=[N+](C)C=CN1CC(N(CC2=CC=C(OC)C=C2)CC(NC(C)C)=O)=O.[I-]	0	>0.25
17c	O/N=C\C1=[N+](C)C=CN1CC(N(CC2=CC=C(OC)C=C2)CC(NCC3=CC=CC=C3)=O)=O.[I-]	0	>0.25
17d	O/N=C\C1=[N+](C)C=CN1CC(N(CCCC)CC(NCC2=CC=CC=C2)=O)=O.[I-]	0	>0.25
